# Supplementary material for: pH-Dependence Cytotoxicity Evaluation of Artepillin C against Tumor Cells
Source: Life (Basel). 2023 Nov 9;13(11):2186. doi: 10.3390/life13112186 (PMC10672498; doi:10.3390/life13112186)
Supplement: Supplementary file 1 [file life-13-02186-s001.zip › life-2638628-supplementary.pdf]

# The pH-dependence on the cytotoxicity of Artepillin C against tumor cells

## SUPPORTING INFORMATION

Wallance Moreira Pazin<sup>1,2</sup>, Renata R. Miranda<sup>2</sup>, Karina A. Toledo<sup>3</sup>, Frank Kjeldsen<sup>2</sup>, Carlos J. L. Constantino<sup>4</sup> and Jonathan R. Brewer<sup>2,\*</sup>

<sup>1</sup> Department of Physics and Meteorology, School of Sciences, São Paulo State University (UNESP), Bauru, SP, Brazil; wallance.pazin@unesp.br (W.M.P)

<sup>2</sup> Department of Biochemistry and Molecular Biology, University of Southern Denmark, Odense, Denmark; renatam.bio@gmail.com (R.R.M); frankk@bmb.sdu.dk (F.K.)

<sup>3</sup> Department of Biological Sciences, School of Sciences, Humanities and Languages, São Paulo State University (UNESP), Assis, SP, Brazil (karina.toledo@unesp.br)

<sup>4</sup> Department of Physics, School of Sciences and Technology, São Paulo State University (UNESP), Presidente Prudente, SP, Brazil; carlos.constantino@unesp.br (C.J.L.C)

\* Correspondence: brewer@bmb.sdu.dk; Tel.: ((+45)6550-3505; Syddansk Universitet, Campusvej, 55, 5230, Odense M, Denmark)

## Supporting information 1

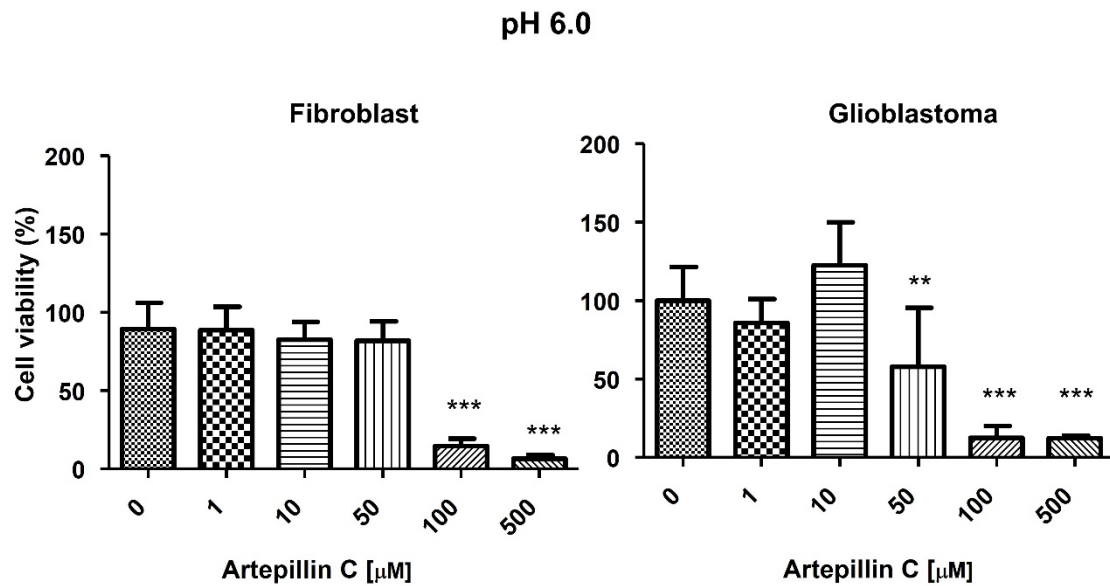

**Figure S1.** Cell viability percentage for fibroblast and glioblastoma cell line at pH 6.0, obtained by means of MTT assay, after 24h incubation, exposed to 0, 1, 10, 50, 100 and 500  $\mu$ M of Artepillin C. \*\* for  $p < 0.05$ , \*\*\* for  $p < 0.001$  compared to the relative control (0  $\mu$ M Artepillin C, pH 6.0).

## Supporting Information 2

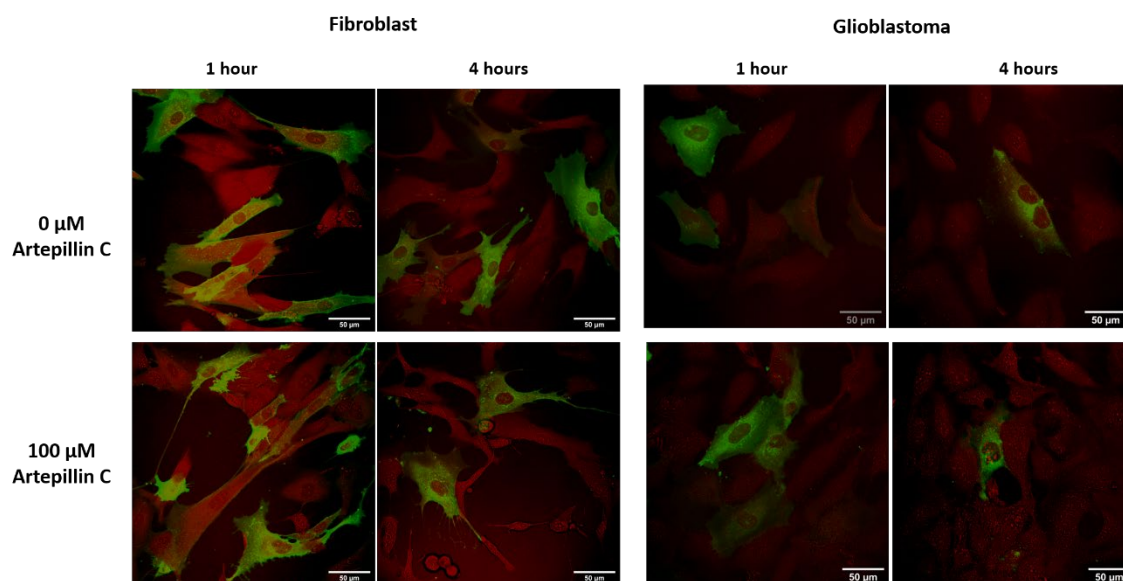

**Figure S2.** Confocal fluorescence (green) and CARS microscopy (red) images of fibroblast (left) and glioblastoma (right) images were collected after 1h and 4h of Artepillin C incubation, at pH 6.0, in the absence and presence of 100  $\mu\text{M}$  of Artepillin C. The images are representative from samples analyzed in triplicate.

### Supporting Information 3

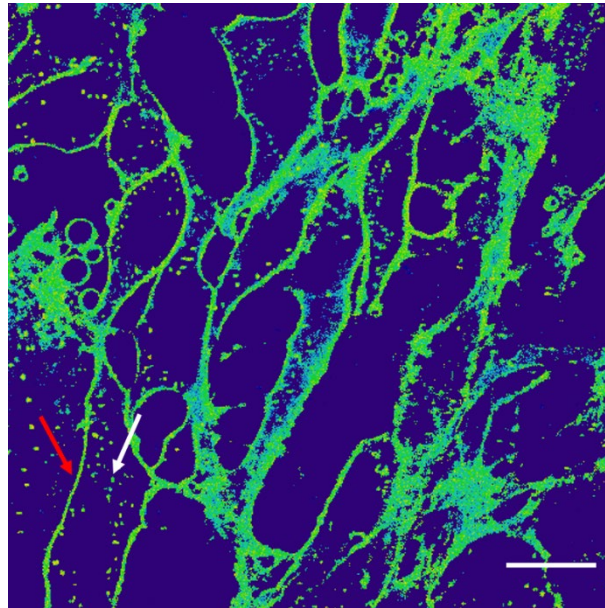

**Figure S3.** Laurdan-GP image obtained for fibroblast cells incubated for 8h at pH 6.0, in the presence of 100  $\mu$ M of Artepillin C. The white and red arrows (lower left) indicate lysosome and cell membrane, respectively. Scale bar 50  $\mu$ m.
